# Supplementary material for: High-performance and selective adsorption of ZIF-8/MIL-100 hybrids towards organic pollutants
Source: Royal Society of Chemistry journal article supplement (doi:10.1039/d1na00819f), 2022-01-01
Supplement: d1na00819f1.pdf [file d1na00819f1.pdf]

## Electronic Supplementary Information to the paper “High-performance and selective adsorption of ZIF-8/MIL-100 hybrids towards organic pollutants”

Yukun Zhong<sup>1,†</sup>, Xueliang Mu<sup>1,†,\*</sup>, and U Kei Cheang<sup>1,\*</sup>

<sup>1</sup> Department of Mechanical and Energy Engineering, Southern University of Science and Technology, Shenzhen 518055, China

\*corresponding author. E-mail: cheanguk@sustech.edu.cn and muxl@sustech.edu.cn ; Tel.: +86-755-88015352

† These two authors contributed equally to this work.

Table S1 Molecular structure, size, and weight for each organic pollutant

| Organic pollutant      | Molecular Structure                                                                 | Molecular Size (nm×nm×nm) | Molecular Weight (g/mol) | UV adsorption (nm) |
|------------------------|-------------------------------------------------------------------------------------|---------------------------|--------------------------|--------------------|
| RHB<br>(Rhodamine B)   | 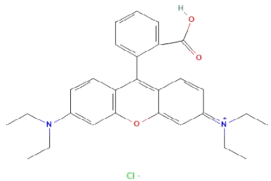 | 1.59×1.18×0.56            | 479.0                    | 556                |
| MB<br>(Methylene Blue) |  | 1.26×0.77×0.65            | 319.9                    | 666                |
| SD-III<br>(Sudan III)  |  | 1.57×0.73×0.68            | 352.4                    | 507                |
| MO<br>(Methyl Orange)  |  | 1.31×0.55×0.18            | 327.34                   | 464                |

|                              |                                                                                                                                                                                                                                                                                                                                                                                                                         |                       |              |            |
|------------------------------|-------------------------------------------------------------------------------------------------------------------------------------------------------------------------------------------------------------------------------------------------------------------------------------------------------------------------------------------------------------------------------------------------------------------------|-----------------------|--------------|------------|
| <p>TC<br/>(Tetracycline)</p> | 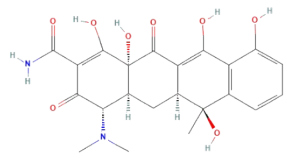 <p>The image shows the chemical structure of Tetracycline, a tetracycline antibiotic. It features a complex polycyclic core with four fused rings: a dimethylamino group, a tetracyclic core, a dimethylamino group, and a tetracyclic core. The structure is highly detailed with stereochemistry and various functional groups.</p> | <p>1.26×0.69×0.76</p> | <p>444.4</p> | <p>357</p> |
| <p>AMX<br/>(Amoxicillin)</p> |  <p>The image shows the chemical structure of Amoxicillin, a penicillin antibiotic. It features a beta-lactam ring fused to a thiazolidine ring, with a side chain containing a para-hydroxyphenyl group and a methyl group. The structure is highly detailed with stereochemistry and various functional groups.</p>                  | <p>1.24×0.56×0.46</p> | <p>365.4</p> | <p>251</p> |
